# Supplementary material
Source: Springer Nature journal article supplement (https://www.springermedizin.de/resource/supplementary/12958_2006_305_MOESM9_ESM.pdf/9567586)

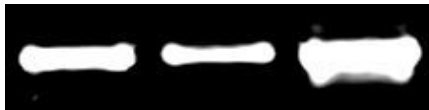

***Spag11t***

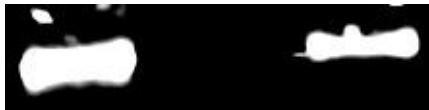

***Spag11c***

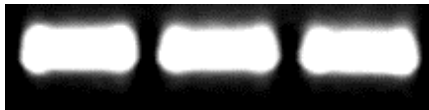

***Gapdh***

**S**

**C**

**C+T**

Supplement: MOESM9 [file 9567586]
